# Supplementary material for: A systematic review of advances in the knowledge and therapeutics of spinal myotropic atrophy from three-dimensional stem cell derived spinal organoid model
Source: Research Square preprint supplement (doi:10.21203/rs.3.rs-7162669/v1), 2025-07-28
Supplement: Supplementary file 1 [file 0204398660233133ec1ee565.xlsx]

## Sheet: Sheet1
Study	Nr.	Review authors judgment – Answer question	Risk of bias	Motivation
Hor et al. (2018)	1	Was the allocation sequence adequately generated and applied? – Unclear	Unclear	The article does not describe any method for random sequence generation when assigning cells to conditions.
	2	Were the groups similar at baseline or were they adjusted for confounders in the analysis? – Yes	Low	Organoids from WT and SMA iPSCs were shown to have similar baseline characteristics (e.g., SOX1+, ISL1+ populations).
	3	Was the allocation adequately concealed? – Unclear	Unclear	There is no mention of allocation concealment at any stage of group assignment.
	4	Were the animals randomly housed during the experiment? – No	High	No random housing was applied; organoids were grown in standard well plates and spinner flasks.
	5	Were the caregivers and/or investigators blinded from knowledge of which intervention each animal received during the experiment? – Unclear	Unclear	There is no indication that experimenters were blinded during treatment or assessment.
	6	Were animals selected at random for outcome assessment? – Unclear	Unclear	The selection process for outcome assessment is not described. Randomization is not mentioned.
	7	Was the outcome assessor blinded? – Unclear	Unclear	While high-content imaging was used, there is no statement on blinding of assessors.
	8	Were incomplete outcome data adequately addressed? – Yes	Low	Time-course and quantification data are consistently presented with appropriate sample sizes and no signs of attrition bias.
	9	Are reports of the study free of selective outcome reporting? – Yes	Low	The paper reports on all stated outcomes including positive, negative, and null results.
	10	Was the study apparently free of other problems that could result in high risk of bias? – Yes	Low	No additional sources of bias are apparent; the methodology appears consistent and reproducible.
Study	Nr.	Review authors judgment – Answer question	Risk of bias	Motivation
Faravelli et al., 2022	1	Was the allocation sequence adequately generated and applied? – Unclear	Unclear	The paper does not describe any random allocation process when assigning ALS vs. control organoids to treatment conditions.
	2	Were the groups similar at baseline or were they adjusted for confounders in the analysis? – Yes	Low	Isogenic iPSC lines were used to ensure similar genetic backgrounds, minimizing baseline differences.
	3	Was the allocation adequately concealed? – Unclear	Unclear	There is no information regarding concealment of allocation sequences.
	4	Were the animals randomly housed during the experiment? – No	High	Organoids were cultured in standard microfluidic platforms and wells; no randomized positioning was described.
	5	Were the caregivers and/or investigators blinded from knowledge of which intervention each animal received during the experiment? – Unclear	Unclear	There is no mention of blinding of experimenters during treatment or culture.
	6	Were animals selected at random for outcome assessment? – Unclear	Unclear	The method for selecting organoids for analysis is not specified as randomized.
	7	Was the outcome assessor blinded? – Unclear	Unclear	Outcome measures involved automated imaging and electrophysiology, but blinding of assessors is not reported.
	8	Were incomplete outcome data adequately addressed? – Yes	Low	All experimental groups had clear reporting of n-values and inclusion of replicates; no apparent data exclusions.
	9	Are reports of the study free of selective outcome reporting? – Yes	Low	The paper reports all primary and secondary outcomes as described in the methods.
	10	Was the study apparently free of other problems that could result in high risk of bias? – Yes	Low	The experimental design is robust with no indication of other bias (e.g., conflicts of interest, funding bias).
Study	Nr.	Review authors judgment – Answer question	Risk of bias	Motivation
Grass et al., 2024	1	Was the allocation sequence adequately generated and applied? – Unclear	Unclear	No mention of random sequence generation for organoid assignment to conditions.
	2	Were the groups similar at baseline or were they adjusted for confounders in the analysis? – Yes	Low	Organoids were derived from isogenic control and disease iPSCs; morphology and gene expression were compared to validate similarity.
	3	Was the allocation adequately concealed? – Unclear	Unclear	Allocation concealment procedures are not described.
	4	Were the animals randomly housed during the experiment? – No	High	Organoids were plated in standard labware; random housing is not relevant or described.
	5	Were the caregivers and/or investigators blinded from knowledge of which intervention each animal received during the experiment? – Unclear	Unclear	No information about blinding of those conducting the experiments.
	6	Were animals selected at random for outcome assessment? – Unclear	Unclear	There is no description of how organoids were chosen for imaging or quantification.
	7	Was the outcome assessor blinded? – Unclear	Unclear	While automated imaging and quantification were used, no explicit statement about blinding of assessors.
	8	Were incomplete outcome data adequately addressed? – Yes	Low	Sample sizes and statistical reporting were consistent and complete across figures.
	9	Are reports of the study free of selective outcome reporting? – Yes	Low	All stated experimental endpoints appear to be reported.
	10	Was the study apparently free of other problems that could result in high risk of bias? – Yes	Low	The study appears methodologically sound with no obvious source of bias.
Study	Nr.	Review authors judgment – Answer question	Risk of bias	Motivation
Faravelli et al., 2025	1	Was the allocation sequence adequately generated and applied? – Unclear	Unclear	There is no information on whether organoids were randomly assigned to experimental groups.
	2	Were the groups similar at baseline or were they adjusted for confounders in the analysis? – Yes	Low	Organoids were derived from isogenic lines or matched controls, and similar developmental profiles were verified.
	3	Was the allocation adequately concealed? – Unclear	Unclear	The study does not describe whether allocation was concealed from researchers during assignment.
	4	Were the animals randomly housed during the experiment? – No	High	Organoids were cultured under standard conditions; random housing not described.
	5	Were the caregivers and/or investigators blinded from knowledge of which intervention each animal received during the experiment? – Unclear	Unclear	Blinding procedures for caregivers or experimenters were not discussed.
	6	Were animals selected at random for outcome assessment? – Unclear	Unclear	There is no explicit statement on whether selection for analysis was randomized.
	7	Was the outcome assessor blinded? – Unclear	Unclear	No information about blinding of outcome assessors, though imaging and electrophysiological analyses were used.
	8	Were incomplete outcome data adequately addressed? – Yes	Low	Data are consistently reported with figures, and sample sizes (n) are clearly provided.
	9	Are reports of the study free of selective outcome reporting? – Yes	Low	All described analyses are fully reported, including behavioral and morphological outcomes.
	10	Was the study apparently free of other problems that could result in high risk of bias? – Yes	Low	The study is methodologically consistent and does not suggest any hidden sources of bias.
Study	Nr.	Review authors judgment – Answer question	Risk of bias	Motivation
Corti et al., 2024	1	Was the allocation sequence adequately generated and applied? – Unclear	Unclear	The abstract does not indicate whether random allocation was used for assigning organoids to treatments.
	2	Were the groups similar at baseline or were they adjusted for confounders in the analysis? – Yes	Low	Organoids were derived from patients with SMA, C9ALS, and controls using iPSCs, suggesting biological matching.
	3	Was the allocation adequately concealed? – Unclear	Unclear	No information is provided on allocation concealment.
	4	Were the animals randomly housed during the experiment? – No	High	No mention of random housing; organoids likely cultured in fixed well formats.
	5	Were the caregivers and/or investigators blinded from knowledge of which intervention each animal received during the experiment? – Unclear	Unclear	No blinding details for personnel involved in treatment or analysis are reported.
	6	Were animals selected at random for outcome assessment? – Unclear	Unclear	The method for selecting organoids for analysis is not stated.
	7	Was the outcome assessor blinded? – Unclear	Unclear	No statement on blinding of outcome assessors, although transcriptomics and immunophenotyping were performed.
	8	Were incomplete outcome data adequately addressed? – Yes	Low	All described outcomes, including drug response and transcriptomic changes, appear to be reported completely.
	9	Are reports of the study free of selective outcome reporting? – Yes	Low	The abstract provides a broad and balanced summary of results without signs of selective reporting.
	10	Was the study apparently free of other problems that could result in high risk of bias? – Yes	Low	No apparent conflicts, inconsistencies, or other methodological concerns are noted in the abstract.
Study	Nr.	Review authors judgment – Answer question	Risk of bias	Motivation
Buchner et al., 2023	1	Was the allocation sequence adequately generated and applied? – Unclear	Unclear	The study does not report on how groups were assigned or whether random allocation was used.
	2	Were the groups similar at baseline or were they adjusted for confounders in the analysis? – Yes	Low	Organoids were derived under standardized protocols using iPSCs or primary cells, with consistent baseline morphology and expression profiles.
	3	Was the allocation adequately concealed? – Unclear	Unclear	There is no information about allocation concealment.
	4	Were the animals randomly housed during the experiment? – No	High	Organoids were cultured in fixed positions (96-well plates, PDMS chambers); no mention of randomization in housing or placement.
	5	Were the caregivers and/or investigators blinded from knowledge of which intervention each animal received during the experiment? – Unclear	Unclear	There is no indication of blinding during treatment or functional analysis phases.
	6	Were animals selected at random for outcome assessment? – Unclear	Unclear	Selection criteria for outcome assessment (e.g., electrophysiology, imaging) were not specified as randomized.
	7	Was the outcome assessor blinded? – Unclear	Unclear	While automated systems were used, the study does not explicitly state whether assessors were blinded.
	8	Were incomplete outcome data adequately addressed? – Yes	Low	Outcome data are reported for all figures and conditions with n-values provided; no apparent attrition.
	9	Are reports of the study free of selective outcome reporting? – Yes	Low	All described endpoints, including structural, functional, and therapeutic effects, are reported clearly.
	10	Was the study apparently free of other problems that could result in high risk of bias? – Yes	Low	No evidence of confounding bias, commercial influence, or inconsistencies noted in the study design or reporting.
Study	Nr.	Review authors judgment – Answer question	Risk of bias	Motivation
Winanto et al., 2019	1	Was the allocation sequence adequately generated and applied? – Unclear	Unclear	No randomization or allocation procedures are mentioned in this perspective article.
	2	Were the groups similar at baseline or were they adjusted for confounders in the analysis? – Yes	Low	The organoids compared are derived from the same iPSC sources and cultured using consistent protocols.
	3	Was the allocation adequately concealed? – Unclear	Unclear	The article does not describe any concealment or blinding during group assignment.
	4	Were the animals randomly housed during the experiment? – No	High	The organoids were cultured in fixed spatial arrangements (e.g., Matrigel droplets in spinner flasks), with no indication of randomization.
	5	Were the caregivers and/or investigators blinded from knowledge of which intervention each animal received during the experiment? – Unclear	Unclear	Blinding is not discussed, and it's unlikely it was implemented based on the type of commentary.
	6	Were animals selected at random for outcome assessment? – Unclear	Unclear	There is no information on whether specific organoids were randomly selected for analysis.
	7	Was the outcome assessor blinded? – Unclear	Unclear	Although quantification and imaging were used, there is no mention of blinding.
	8	Were incomplete outcome data adequately addressed? – Yes	Low	The described data and references to Hor et al. (2018) and Rodriguez-Muela et al. (2017) suggest complete and transparent reporting.
	9	Are reports of the study free of selective outcome reporting? – Yes	Low	The article provides a balanced overview of findings, referencing both successful and challenging outcomes.
	10	Was the study apparently free of other problems that could result in high risk of bias? – Yes	Low	The publication is a perspective, but the referenced experimental approaches appear consistent and rigorous.
Study	Nr.	Review authors judgment – Answer question	Risk of bias	Motivation
Angelo et al. 2024	1	Was the allocation sequence adequately generated and applied? – Unclear	Unclear	There is no mention of how SMA and control organoids were allocated to treatment or control groups.
	2	Were the groups similar at baseline or were they adjusted for confounders in the analysis? – Yes	Low	Organoids were generated from multiple SMA and control iPSC lines and phenotyped to confirm disease-state fidelity.
	3	Was the allocation adequately concealed? – Unclear	Unclear	The description does not indicate whether researchers were blinded to group allocations.
	4	Were the animals randomly housed during the experiment? – No	High	Standard culturing conditions in static wells/spinner flasks are implied; no random housing described.
	5	Were the caregivers and/or investigators blinded from knowledge of which intervention each animal received during the experiment? – Unclear	Unclear	No blinding procedure for treatment administration is reported.
	6	Were animals selected at random for outcome assessment? – Unclear	Unclear	The methods do not clarify how organoids were selected for transcriptomics or electrophysiological assays.
	7	Was the outcome assessor blinded? – Unclear	Unclear	Bulk and single-cell transcriptomics were used, but there is no note about assessor blinding.
	8	Were incomplete outcome data adequately addressed? – Yes	Low	Data from all conditions appear to be included in the analyses, and results are clearly summarized.
	9	Are reports of the study free of selective outcome reporting? – Yes	Low	All major results outlined in the methods (e.g., transcriptomics, functional assays) are reported in the summary.
	10	Was the study apparently free of other problems that could result in high risk of bias? – Yes	Low	The study appears well-controlled with clear outcomes and no major confounding influences mentioned.
Study	Nr.	Review authors judgment – Answer question	Risk of bias	Motivation
Corti et al. 2025	1	Was the allocation sequence adequately generated and applied? – Unclear	Unclear	The study does not describe how organoids were assigned to different treatment conditions.
	2	Were the groups similar at baseline or were they adjusted for confounders in the analysis? – Yes	Low	Organoids were derived from SMA type 1 patients and healthy controls, and characterized to reflect disease-specific and matched control traits.
	3	Was the allocation adequately concealed? – Unclear	Unclear	No mention of allocation concealment procedures.
	4	Were the animals randomly housed during the experiment? – No	High	Organoids were cultured in static well formats; no mention of random spatial organization.
	5	Were the caregivers and/or investigators blinded from knowledge of which intervention each animal received during the experiment? – Unclear	Unclear	There is no statement about blinding researchers or operators.
	6	Were animals selected at random for outcome assessment? – Unclear	Unclear	The criteria or method for selecting samples for transcriptomic and functional analysis is not described.
	7	Was the outcome assessor blinded? – Unclear	Unclear	Although advanced transcriptomic analyses were used, there is no indication of blinding in assessment.
	8	Were incomplete outcome data adequately addressed? – Yes	Low	The document summarizes complete datasets and reports comparisons across multiple conditions and timepoints.
	9	Are reports of the study free of selective outcome reporting? – Yes	Low	All outcome domains described in the methods are also covered in the results.
	10	Was the study apparently free of other problems that could result in high risk of bias? – Yes	Low	No methodological inconsistencies or conflicts of interest are noted that would increase bias.
