# Supplementary material for: A systematic review of advances in the knowledge and therapeutics of spinal myotropic atrophy from three-dimensional stem cell derived spinal organoid model
Source: Research Square preprint supplement (doi:10.21203/rs.3.rs-7162669/v1), 2025-07-28
Supplement: Supplementary file 2 [file 2c36fa1264b191ccea37dc8f.docx]

For PubMed:

("muscular atrophy, spinal"[MeSH Terms] OR "spinal muscular atroph*"[All Fields] OR "SMA"[All Fields] OR "motor neuron disease*"[All Fields] OR "anterior horn cell*"[All Fields] OR "lower motor neuron*"[All Fields] OR "neuromuscular disorder*"[All Fields] OR "smn protein*"[All Fields] OR "SMN1"[All Fields] OR "survival motor neuron*"[All Fields]) AND ("Organoids"[MeSH Terms] OR "organoid*"[All Fields] OR "stem cell derived organoid*"[All Fields] OR "3d culture*"[All Fields] OR "three dimensional culture*"[All Fields] OR "self organizing tissue*"[All Fields] OR "mini organ*"[All Fields] OR "tissue model*"[All Fields] OR "organoid model*"[All Fields] OR "pluripotent stem cell derived model*"[All Fields]) AND ("models, biological"[MeSH Terms] OR "biological model*"[All Fields] OR "in vitro model*"[All Fields] OR "cellular model*"[All Fields]) AND ("Therapeutics"[MeSH Terms] OR "therapeutic*"[All Fields] OR "therapy"[All Fields] OR "treatment*"[All Fields] OR "intervention*"[All Fields])

22

For Embass:

('spinal muscular atrophy'/exp OR 'spinal muscular atrophy':ti,ab OR SMA:ti,ab OR 'motor neuron disease':ti,ab OR 'anterior horn cell':ti,ab OR 'lower motor neuron':ti,ab OR 'neuromuscular disorder':ti,ab OR 'smn protein':ti,ab OR SMN1:ti,ab OR 'survival motor neuron':ti,ab) AND ('organoid'/exp OR organoid*:ti,ab OR 'stem cell derived organoid*':ti,ab OR '3d culture*':ti,ab OR 'three dimensional culture*':ti,ab OR 'self organizing tissue*':ti,ab OR 'mini organ*':ti,ab OR 'tissue model*':ti,ab OR 'organoid model*':ti,ab OR 'pluripotent stem cell derived model*':ti,ab) AND ('biological model'/exp OR 'biological model*':ti,ab OR 'in vitro model*':ti,ab OR 'cellular model*':ti,ab) AND ('therapeutics'/exp OR therapeutic*:ti,ab OR therapy:ti,ab OR treatment*:ti,ab OR intervention*:ti,ab)
