# Supplementary material for: A systematic review of advances in the knowledge and therapeutics of spinal myotropic atrophy from three-dimensional stem cell derived spinal organoid model
Source: Research Square preprint supplement (doi:10.21203/rs.3.rs-7162669/v1), 2025-07-28
Supplement: Supplementary file 3 [file c2d3f9723464153182351c11.xlsx]

## Sheet: Sheet1
Methodologies for Generation, Validation, and Characterization of Disease-Specific Spinal Organoids
Study	Organoid Generation	Validation	Characterization in Disease Modeling
Hor et al. 2018	Spinal organoids were derived from human induced pluripotent stem cells (iPSCs) using a multi-step differentiation protocol. iPSCs were dissociated into single cells, seeded in low-attachment plates, and induced toward neural fate via dual SMAD inhibition (LDN-193189 for BMP suppression; CHIR99021 for Wnt activation). Retinoic acid (days 3–17) caudalized the tissue, while purmorphamine (Sonic Hed…	Organoids were validated using multiple approaches. Immunostaining confirmed the expression of neural progenitor markers such as SOX1 and Nestin by day 10, with 86% of cells expressing SOX1 by day 14, indicating a high degree of cellular homogeneity. Spatial organization was evident, showing apical-basal patterning characterized by proliferative SOX1+ progenitors located apically and post-mitotic…	SMA organoids derived from Type I and Type II patient iPSCs were extensively characterized to elucidate disease mechanisms. During early neurodevelopment, no significant deficits were observed, as SMA organoids exhibited comparable levels of SOX1+ neural progenitors and ISL1+ motor neurons at days 21 and 28 relative to controls. However, by day 35, substantial motor neuron loss was evident, with …
Faravelli et al., 2022	Spinal cord organoids (SCOs) and cerebral organoids were derived from human induced pluripotent stem cells (iPSCs) from healthy controls and SMA type 1 patients. SCOs utilized a free-floating 3D protocol incorporating caudalizing (retinoic acid, RA) and ventralizing (Smoothened Agonist, SAG) molecules to mimic spinal cord development. Cerebral organoids followed an established cerebral differenti…	Organoids were validated through morphological and molecular profiling. Immunohistochemistry confirmed expression of stage-specific markers: neural progenitors (SOX2, OLIG2), neurons (TUJ1, DCX), spinal motor neurons (ISL1, HOXB4), and astrocytes (GFAP). Quantitative PCR (qRT-PCR) tracked temporal gene expression (e.g., OLIG2, HOXB4), demonstrating recapitulation of in vivo development. Single-ce…	SMA pathology was characterized using integrated approaches: Transcriptomics: scRNA-seq revealed pervasive gene dysregulation in SMA SCOs, including downregulation of synaptic genes (SYT4, NRXN1) and axon-stability markers (STMN2, NEFL) in motor neurons. Morphometrics: Reduced axonal length in dissociated SMA neurons and decreased TUJ1+ area indicated developmental defects. TUNEL assays showed el…
Grass et al., 2024	Patient-derived induced pluripotent stem cells (iPSCs) from SMA types I–III were genetically corrected using CRISPR-Cas9-mediated knock-in to convert SMN2 to SMN1 (tagged with the fluorescent reporter Clover). Ventral spinal cord organoids (vSCOs) were generated via an embryoid body (EB)-based protocol, embedding aggregates in extracellular matrix and patterning them with dual SMAD inhibition (SB…	Genetic correction of SMA iPSCs was confirmed through Sanger sequencing, which validated the successful SMN2-to-SMN1 conversion and integration of the Clover tag. Western blotting demonstrated increased SMN protein levels in the corrected cell lines. The functionality of the SMN:Clover fusion protein was further verified by several assays: nuclear “gem” formation and turnover closely resembled th…	Organoids were evaluated through a combination of molecular, cellular, and in vivo analyses. Gene expression profiling using qPCR confirmed the presence of neural markers such as SOX2 and NKX6.1, as well as motor neuron (MN) markers including HB9 and CHAT. Immunofluorescence analysis revealed a reduction in motor neuron populations and an expansion of mesodermal cells within SMA organoids, highli…
Faravelli et al., 2025	Spinal cord organoids (SCOs) and cerebral organoids were generated from induced pluripotent stem cells (iPSCs) derived from healthy controls and patients with SMA type I. SCOs were produced using a dual-phase protocol. During the neural induction phase, embryoid bodies (EBs) were formed in low-attachment plates using neural induction media composed of DMEM/F12, N2 supplement, and heparin. In the …	Organoids were rigorously validated using multiple complementary approaches. Immunohistochemistry (IHC) confirmed the presence of lineage-specific markers, with PAX6 and NESTIN identifying neural progenitors, TUJ1 and ISL1 marking differentiated neurons, and HB9 indicating motor neuron identity—collectively demonstrating successful recapitulation of spinal cord and brain cell types. Single-cell R…	SMA-specific defects in organoids were evaluated using a combination of imaging, functional, and molecular approaches. Longitudinal imaging quantified SOX2⁺ neural progenitors and TUJ1⁺ neurons over time, revealing impaired neuronal differentiation in SMA spinal cord organoids (SCOs). Apoptosis assays using TUNEL staining showed significantly increased cell death in SMA organoids at two months of…
Corti et al., 2024	The study (149VP) utilized patient-derived induced pluripotent stem cells (iPSCs) from individuals with spinal muscular atrophy (SMA), amyotrophic lateral sclerosis (ALS) carrying C9orf72 mutations (C9-ALS), and unaffected controls. These iPSCs were differentiated to create three-dimensional (3D) organoid models specifically representing the human spinal cord and skeletal muscle tissue. This appr…	Organoids were validated by demonstrating disease-specific phenotypes: SMA and C9-ALS organoids exhibited significant cellular/molecular developmental defects versus controls. Pathological features extended beyond motor neurons to other cell types, confirming recapitulation of complex disease mechanisms. Treatment responses mirrored clinical outcomes (e.g., Risdiplam-like compound corrected SMN p…	Multi-modal techniques quantified disease mechanisms and therapeutic effects: Transcriptomics/scRNA-seq: Revealed gene expression shifts across cell types. Immunophenotyping: Identified cell composition (e.g., motor neurons, glia, muscle cells). Functional assays: Multielectrode arrays measured electrophysiological activity. Therapeutic testing: Drug efficacy (e.g., morpholino antisense oligonucl…
Buchner et al., 2023	Spinal Cord Organoids (SCOs) are typically derived from human induced pluripotent stem cells (hiPSCs) via dual SMAD inhibition (e.g., SB431542 + LDN193189) to induce neuroectoderm. Subsequent patterning with morphogens—retinoic acid (RA) for rostrocaudal identity and Sonic hedgehog (SHH) agonists (e.g., SAG) for ventralization—yields spinal motor neurons (spMNs). Advanced protocols differentiate …	SCO fidelity is validated through: Molecular profiling: scRNA-seq comparisons to human fetal spinal cord atlases confirm transcriptional similarity. Spatial characterization: Immunostaining for dorsoventral markers (e.g., OLIG2+ progenitors, ISL1+ spMNs) and apical-basal polarity (SOX1+ apical cells). Functional assays: Electrophysiology (patch-clamp) verifies neuronal activity; neuromuscular jun…	Disease-specific spinal cord organoids (SCOs), such as those for amyotrophic lateral sclerosis (ALS) and spinal muscular atrophy (SMA), are developed using patient-derived or isogenic human induced pluripotent stem cells (hiPSCs). These models enable the quantification of disease phenotypes through various approaches. For example, selective cell-type vulnerability is demonstrated by the loss of s…
Winanto et al., 2019	Organoids are typically derived from induced pluripotent stem cells (iPSCs) using 3D culture systems. For spinal cord organoids, embryoid bodies are caudalized with retinoic acid, ventralized with Sonic Hedgehog (Shh), and encapsulated in Matrigel. Cultured in spinning bioreactors, these self-organize into complex structures mirroring in vivo microenvironments. This approach enables spontaneous r…	Organoids are validated through structural, molecular, and functional benchmarks. Immunostaining confirms cell-type diversity (e.g., motor neurons, V2a/Renshaw interneurons, astrocytes). Rostrocaudal identity is verified via region-specific markers (HOX genes), while maturation is assessed using markers like ChAT⁺ motor neurons. Single-cell RNA sequencing further resolves cellular heterogeneity a…	Organoids recapitulate disease phenotypes by leveraging patient-derived iPSCs. For spinal muscular atrophy (SMA), organoids reveal accelerated motor neuron death without developmental defects, aligning with neurodegeneration mechanisms. They also model cellular interactions (e.g., interneuron synaptopathy) absent in 2D systems. Applications include drug screening in 3D microenvironments to assess…
Angelo et al. 2024	Spinal cord organoids were generated from induced pluripotent stem cells (iPSCs) derived from SMA type 1 patients (n=3) and healthy controls (n=2). Crucially, organoids were exposed to the Risdiplam-like compound bi-daily during the first 80 days of development to model early therapeutic intervention.	The organoid model's relevance to SMA pathology was validated by demonstrating marked cellular and molecular developmental alterations in SMA samples compared to healthy controls. A key functional validation was the reversal of these pathological hallmarks upon treatment with the Risdiplam-like compound.	Comprehensive characterization employed: Bulk transcriptomics and single-cell RNAseq: To identify disease-associated molecular alterations across cell populations and assess drug impact (>15% of disease-affected genes modified). Multielectrode array (MEA) analysis: To evaluate functional neuronal activity. Immunophenotypic characterization: To define cellular composition and marker expression. Sp…
Corti et al. 2025	The study generated 3D spinal cord organoids (SCOs) from induced pluripotent stem cells (iPSCs) derived from spinal muscular atrophy (SMA) type 1 patients and healthy controls. This model replicated human spinal cord development, enabling disease-specific and drug-testing applications.	SCOs were validated by confirming they recapitulated SMA disease phenotypes, including motor neuron degeneration and molecular deficits. This established their fidelity for modeling SMA pathology and assessing therapeutic interventions like the risdiplam analogue (RIS-L).	Characterization focused heavily on drug effects. RIS-L treatment was optimized for dosage (150 nM) and timing (initiated at day 45, not day 30), revealing enhanced motor neuron differentiation and SMN protein restoration. Bulk and single-cell transcriptomics identified: Gene expression shifts toward healthy control levels. Early differentiation defects and neuronal hyperexcitability in SMA. Dela…

## Sheet: Sheet2
Assessing the Contribution of 3D Organoid Models to Understanding Disease Pathophysiology and Cellular Mechanisms
Study
Hor et al. 2018	This study demonstrates that 3D spinal organoids significantly advanced understanding of Spinal Muscular Atrophy (SMA) pathophysiology. The organoids resolved a key debate by showing SMA motor neurons form normally but rapidly degenerate post-maturation, mirroring human disease progression and correlating with clinical severity (Type I > Type II). Critically, organoids validated findings from sim…
Faravelli et al., 2022	This work demonstrates that SMA cerebral and spinal organoids reveal pervasive developmental defects underlying pathophysiology. Single-cell transcriptomics identified transcriptional dysregulation across neural cell populations, including synaptic and axonal genes (STMN2, SYT, NRXN), and confirmed reduced axonal length. Crucially, organoids exposed functional deficits beyond the spinal cord: SMA…
Grass et al., 2024	Based on the study, 3D spinal cord organoids (SCOs) derived from isogenic SMA patient iPSCs significantly advanced understanding of disease pathophysiology by revealing early neurodevelopmental defects preceding neuronal loss. These models demonstrated accelerated motor neuron differentiation, impaired neural progenitor specification, and a neuromesodermal fate bias favoring mesodermal lineages o…
Faravelli et al., 2025	Based on the preprint, 3D spinal cord and cerebral organoids derived from SMA patient iPSCs have significantly advanced understanding of disease pathophysiology. They revealed pervasive, early neurodevelopmental defects beyond motor neuron loss, including altered progenitor dynamics, disrupted neuronal differentiation trajectories, and transcriptional dysregulation across neural populations, capt…
Corti et al., 2024	Based on the abstract, 3D stem cell-derived spinal cord/muscle organoid models have significantly advanced the understanding of neuromuscular disease pathophysiology. Specifically, organoids generated from SMA and ALS patient iPSCs revealed disease-specific disruptions in cellular and molecular development affecting multiple cell types beyond motor neurons, indicating a developmental component to…
Buchner et al., 2023	The review highlights that 3D spinal cord organoid (SCO) models have greatly enhanced our understanding of disease mechanisms, especially in motor neuron diseases (MNDs) such as spinal muscular atrophy (SMA) and amyotrophic lateral sclerosis (ALS). These organoids faithfully mimic human-specific developmental processes, allowing researchers to explore the spatial and temporal dynamics of neurodeg…
Winanto et al., 2019	Based on the analysis, 3D spinal cord organoids significantly advance the understanding of neuromuscular disease pathophysiology and cellular mechanisms by overcoming critical limitations of traditional 2D models. These organoids recapitulate the rostrocaudal patterning of the human spinal cord and generate diverse cell types, including motor neurons, interneurons, and astrocytes, within a spatia…

## Sheet: Sheet3
	Evaluating the Application of 3D Organoid Models in Therapeutic Screening, Drug Discovery, and Personalized Medicine for Disease
Study
Hor et al. 2018	3D spinal organoids derived from SMA patient iPSCs demonstrate significant utility in therapeutic screening and drug discovery. The model recapitulated key disease phenotypes, including motor neuron degeneration, enabling the identification of CDK4/6 inhibitors (e.g., PD 0332991) as neuroprotective agents. Treatment with the inhibitor rescued motor neuron survival in organoids, validating the pla…
Faravelli et al., 2022	3D spinal and cerebral organoids derived from SMA patient iPSCs effectively model disease-specific neurodevelopmental defects, including reduced axonal length, apoptosis, and neuronal hyperexcitability. These organoids serve as robust platforms for therapeutic screening, demonstrated by the successful rescue of SMN protein levels and functional deficits using peptide-conjugated antisense oligonuc…
Grass et al., 2024	3D organoid models demonstrate significant potential for therapeutic screening and personalized medicine. The researchers developed isogenic spinal cord organoids (SCOs) from spinal muscular atrophy (SMA) patient-derived iPSCs, which revealed early neurodevelopmental defects preceding neuronal loss. This model enabled longitudinal assessment of disease mechanisms and drug responses, such as evalu…
Faravelli et al., 2025	Based on the provided study, 3D SMA organoids demonstrate significant utility for therapeutic screening and drug discovery. The model effectively recapitulated disease-specific phenotypes—including developmental defects, hyperexcitability, and splicing errors—enabling rigorous evaluation of an optimized antisense oligonucleotide (r6-MO). Treatment rescued SMN protein levels, corrected aberrant sp…
Corti et al., 2024	Patient-derived 3D spinal cord and muscle organoids demonstrate significant potential for therapeutic screening, drug discovery, and personalized medicine in neuromuscular diseases. These models, generated from SMA, C9-ALS, and control iPSCs, successfully recapitulate disease-specific cellular and molecular pathologies beyond motor neurons, revealing developmental aspects. Crucially, they served …
Buchner et al., 2023	Based on the reviewed literature, 3D spinal cord organoids (SCOs) demonstrate significant promise for therapeutic screening and drug discovery in neuromuscular diseases. These models recapitulate patient-specific pathologies, enabling high-throughput testing of candidate compounds. For instance, SMA organoids treated with Risdiplam-like molecules showed corrected SMN2 splicing and reversal of dis…
Winanto et al., 2019	Based on the provided perspective, 3D spinal cord organoids significantly advance therapeutic screening, drug discovery, and personalized medicine for motor neuron diseases. Unlike traditional 2D cultures, these organoids recapitulate complex in vivo features, including rostrocaudal patterning, diverse spinal cell types (motor neurons, interneurons, astrocytes), and functional neuromuscular junct…
Angelo et al. 2024	Based on Angelo et al. (2024), 3D stem cell-derived organoids, like their spinal cord model for SMA, offer significant advantages for therapeutic screening, drug discovery, and personalized medicine. These models accurately recapitulate complex human disease pathology, including early developmental alterations across multiple cell types, providing a physiologically relevant platform inaccessible …
Corti et al. 2025	Based on the Corti et al. (2025) study, 3D spinal cord organoids (SCOs) derived from patient iPSCs demonstrate significant value for therapeutic screening and drug discovery, particularly for neurological disorders like SMA. This model effectively recapitulated disease pathology and allowed precise in vitro optimization of a risdiplam-like compound (RIS-L). Key drug discovery advantages include: …

## Sheet: Sheet4
	Identifying Current Limitations, Methodological Challenges, and Reproducibility Issues in the Use of 3D Organoids
Study
Hor et al. 2018	Limited Cellular Diversity: The ventral spinal organoids lacked dorsal cell types (e.g., SOX10+ dorsal root ganglia, BRN3A+ sensory neurons, TLX3+ dorsal interneurons), restricting their utility to ventral spinal cord pathology and motor circuits, not sensory-motor integration. Rostro-caudal diversity was also incomplete, with HOXC10+ lumbar motor neurons absent. Methodological Complexity & Repro…
Faravelli et al., 2022	Protocol Variability & Reproducibility: The spinal cord organoid (SCO) differentiation process involves precise timing and combinations of small molecules (such as CHIR99021, retinoic acid, and SAG), which increases technical complexity and contributes to variability between laboratories. Similarly, differences in cerebral organoid methodologies make cross-study comparisons challenging. Functiona…
Grass et al., 2024	Limited Biological Complexity: The organoids lack immune cells, vascular networks, and neuromuscular junctions, potentially overlooking non-cell-autonomous disease mechanisms. Variable Self-Assembly Efficiency: Severe SMA type I lines exhibit impaired hiPSC aggregation, raising questions about developmental generalizability and scalability. Incomplete Phenotypic Rescue: SMN2-to-SMN1 conversion in…
Faravelli et al., 2025	Standardization and Maturation: Spinal cord organoids (SCOs) are less established than cerebral models, leading to variability in differentiation efficiency and cellular composition across protocols and cell lines. Incomplete maturation is evident, with SMA organoids accumulating progenitor cells and exhibiting delayed neuronal differentiation. Technical Complexity: Functional characterization re…
Corti et al., 2024	Complexity of Modeling Interconnected Systems: Creating a physiologically relevant model requires integrating multiple tissues (spinal cord and skeletal muscle). Recapitulating the complex interactions and functional connectivity between these distinct tissue types within a single organoid system remains a significant methodological hurdle. Technical Sophistication and Standardization: The analys…
Buchner et al., 2023	Variability and Reproducibility: SCO differentiation shows high inter- and intra-experimental variability due to iPSC genetic/epigenetic differences, inconsistent extracellular matrices, and variable morphogen responses. Generating specific caudal identities or somite-like structures remains poorly reproducible, even within the same study. Structural and Functional Limitations: Current SCOs lack …
Winanto et al., 2019	Current spinal cord organoids primarily model ventral structures but lack simultaneous dorsal patterning within a single organoid, limiting their ability to recapitulate the complete spinal cord anatomy and sensory-motor circuits. Reproducing the complex morphogen gradients necessary for full dorsoventral and rostrocaudal patterning remains a significant methodological challenge. While protocols …

## Sheet: Sheet5
Identifying Gaps and Guiding Future Research in Spinal Muscular Atrophy (SMA) Using Organoid Models
Study	Gap	Recommendations
Hor et al. 2018	Based on the reviewed literature, organoid models for SMA show significant promise but present critical gaps. Current ventral spinal organoids lack dorsal components (e.g., sensory neurons, dorsal interneurons), limiting studies on sensory-motor connectivity and circuit-level dysfunction. Non-neuronal contributions—such as glia, vasculature, or immune interactions—remain underexplored in these mo…	Future research should prioritize: Integrated Organoids: Develop dorsoventral spinal organoids incorporating sensory neurons to model sensory-motor circuits. Non-neuronal Complexity: Introduce glia, microglia, and vascular cells to study neuroinflammation and the SMA microenvironment. Therapeutic Screening: Use organoids for high-throughput comparative drug testing beyond CDK inhibitors, includin…
Faravelli et al., 2022	s	Future research should prioritize: 1. Optimizing protocols to enhance cellular diversity and maturity, including vascularization and sensory-motor circuitry; 2. Characterizing extra-spinal pathology (e.g., cortex, brainstem) using region-specific organoids; 3. Integrating multi-tissue assembloids to model systemic interactions; and 4. Leveraging organoids for personalized drug screening, especial…
Grass et al., 2024	Based on the study, key gaps in SMA organoid research include: (1) limited cellular complexity (e.g., absence of vascular/immune components affecting progenitor specification), (2) insufficient representation of SMA heterogeneity (only one type I line deeply characterized), and (3) unresolved questions about SMN2-to-SMN1 correction efficacy due to potential epigenetic dysregulation or off-target …	Future directions should prioritize: 1. Developing multi-tissue assembloids integrating neuromuscular junctions and non-neural cells to model systemic pathology. 2. Expanding isogenic cohorts across SMA subtypes to uncover severity-specific mechanisms. 3. Applying epigenomic profiling to organoids to assess irreversible developmental disruptions post-SMN restoration. 4. Utilizing base-edited unta…
Faravelli et al., 2025	Based on the reviewed literature, key gaps in SMA organoid research include: 1. Limited modeling of later disease stages—current studies focus predominantly on developmental defects, with insufficient exploration of chronic neurodegeneration or aging phenotypes. 2. Incomplete cellular complexity—most models lack integrated non-neuronal components (e.g., vasculature, immune cells, and skeletal mus…	Future research should prioritize: 1. Developing multi-organoid systems to recapitulate neuromuscular junctions and systemic interactions. 2. Extending culture durations to model late-onset pathology and treatment durability. 3. Leveraging patient-derived organoids for personalized drug screening, especially for treatment-resistant cases. 4. Integrating CRISPR-based tools to dissect SMN2 splicing…
Corti et al., 2024	Current SMA organoid models, while demonstrating disease-specific developmental defects and response to SMN-targeting therapies, primarily capture early pathology. A significant gap exists in modeling the functional neuromuscular junction (NMJ), the critical synapse affected in SMA, within these co-culture systems. Furthermore, there is limited evidence of organoids maturing to model chronic dise…	Future research must prioritize generating organoid models incorporating functional NMJs to directly study synapse pathology and therapy effects. Efforts should focus on extending organoid culture duration and introducing maturation factors to model later disease progression and aging. Crucially, studies need to integrate functional assessments—such as electrophysiological measurements of neurona…
Buchner et al., 2023	Based on the review, key gaps in SMA organoid research include: (1) Limited representation of region-specific vulnerability (lumbar motor neurons), as most protocols yield cervical identities; (2) Inadequate maturation of organoids to postnatal stages, restricting study of later disease mechanisms; (3) Lack of functional vascularization, hindering nutrient delivery and modeling of neurovascular i…	Future efforts should prioritize: (1) Optimizing axial patterning to generate lumbar-specific spinal cord organoids; (2) Integrating prolonged culture with metabolic/pharmacological maturation strategies; (3) Incorporating vascular networks or assembloid approaches; and (4) Leveraging isogenic lines to dissect cell-type-specific pathologies.
Winanto et al., 2019	Current spinal cord organoid models primarily recapitulate ventral structures but lack integrated dorsal sensory components, limiting the study of complete sensory-motor circuits implicated in SMA. Additionally, while organoids generate diverse spinal cell types (interneurons, glia), their specific contributions to SMA pathology beyond motor neurons remain underexplored. The mechanisms underlying…	Future research should prioritize generating fused dorsal-ventral spinal cord organoids or employing microfluidic devices to establish spatial morphogen gradients, enabling the assembly of functional sensory-motor circuits for holistic disease modeling. Leveraging the inherent cellular heterogeneity of organoids is crucial to systematically define the roles of non-motor neuron cells (interneurons…
